# Supplementary material for: Improved Quantitative Real-Time PCR Protocol for Detection and Quantification of Methanogenic Archaea in Stool Samples
Source: MDPI journal article supplement (doi:10.3390/microorganisms11030660), 2023-03-05
Supplement: s1 [file s1]

# CLUSTAL

```

gi309253887/1-472 GGTGGCGTCGGATTACAAATGTATGCAACACCAGCATAACCAATGATATCGTCGATGAC
gi930068978/1-469 GGTGGTGTTCGGGTTACACAGTATGCAACCCGAGCATAACCCGACAACATCCTCGATGAC
gi930068946/1-466 GGTGGTGTTCGGGTTACACAGTATGCAACCCGAGCATAACCCGACAACATCCTCGACGAC
gi954036668/1-468 GGTGGTGTTCGGATTACCCAGTATGCAACCCGCTGCATACACCCGACAACATCCTTGACGAC
gi930068996/1-469 GGTGGTGTTCGGATTACCCAAATATGCAACCCGCTGCATACACCCGACAACATCCTCGATGAC
gi428274410/1-489 GGTGGTGTTCGGATTACCCAGTATGCAACAGCCGCATACACCCGACAATATCCTCGATGAG
gi954036662/1-94 GGTGGTGTTCGGCTTTACCCAGTATGCAACAGCTGCATACACCCGACGATATCCTCGACAAC
gi954036666/1-486 GGTGGTGTTCGGCTTTACCCAGTATGCAACAGCTGCATACACCCGACGATATCCTCGACAAC
gi930068992/1-487 GGTGGTGTTCGGCTTTACCCAGTATGCAACAGCTGCATACACTGACGATATCCTCGACAAC
gi930068990/1-487 GGTGGTGTTCGGGTTCACTCAGTATGCAACAGCTGCATACACTGATGATATCCTCGACAAC
gi950655841/1-488 GGTGGCGTCGGGTTACCCAGTATGCAACAGCTGCATACACCCGATGACATCCTCGACAAC
gi930068952/1-487 GGTGGTGTTCGGGTTCACTCAGTATGCAACAGCTGCATACACTGATGACATCCTTGACAAC
gi58615486/1-470 GGTGGTGTTCGGATTACGCAGTACGCAACAGCAGCATAACCAACGATGTGCTGGATGAC
gi5616127/1-466 GGTGGTGTTCGGATTACGCAGTACGCAACAGCGGCATACACGAACGATGTCTGGATGAC
gi82492006/1-464 GGTGGTGTAGGATTACACAAATATGCTACAGCAGCATATACTGATAATGTATTAGATGAC
gi262358095/1-470 GGTGGTGTAGGATTACACAGTATGCAACAGCAGCATATACTGATAATGTATTAGATGAC
gi629633272/1-472 GGTGGTGTAGGATTACACAAATATGCTACTGCAGCATACACTGATAATGTATTAGACGAC
gi629633282/1-472 GGTGGTGTAGGATTCACTCAATATGCTACTGCAGCATATACTGATAATGTATTAGACGAC
gi334085683/1-468 GGTGGTGTAGGATTACCCAAATACGCAACCCGAGCATAACACTGACGACGATATTAGATGAC
gi217792440/1-467 GGTGGTGTAGGATTACACAGTATGCTACAGCAGCATATACTGATAATGTTCTTGATGAC
gi498543114/1-395 -----
gi629633278/1-472 GGTGGTGTAGGATTTACTCAATATGCTACCCGAGCATATACTGATAATGTATTAGATGAC
gi145370874/1-445 GGTGGTGTGGATTTACTCAATACGCATCTGCAGCTTATACTGACAATATTCTTGACGAT
gi311141403/1-440 GGTGGTGTGGATTTACCCAAATACGCATCTGCAGCTTATACTGACAATATTCTTGACGAT
gi629633284/1-466 GGTGGTGTGGTTTTACACAAATATGCTAGTGCAGCTTATACTGATGATATCCTTGACGAT
gi629633280/1-466 GGTGGTGTAGGATTTACTCAATATGCAAGTGCAACATATACTGATGATATATTAGATGAT

```

```

gi309253887/1-472 TTCTGTACTGGGGCAACGACTATGCAGCAAAGAA--ATA---CGGC-----GG-----
gi930068978/1-469 TACTGCTACTACGGTATGGACTATATCAAGTCCAA--GTT---CGGT-----GG-----
gi930068946/1-466 TACACCTACTACGGTATGGACTATGTCAAGTCCAA--GTA---CGGT-----GG-----
gi954036668/1-468 TACTGCTACTATGGTCTTGACTATGTCAAGAAGAA--CCA---CGGT-----GG-----
gi930068996/1-469 TACTGTTATTACGGTCTTGACTATGTCAAGAAGAA--ACA---CGGT-----GG-----
gi428274410/1-489 TTCTGCTACTATGGTATGGACTACATCAAAGACAAGTACA---AGGTGCGACTGG-----
gi954036662/1-94 AGCGTGTACTACAACATCGACTACATCAACGACA-----
gi954036666/1-486 AACGTGTACTACAACATCGACTACATCAACGACAA--GTA---CAAA-----GGTGCTGC
gi930068992/1-487 AACGTGTACTACAATGTGCGACTACATCAACGACAA--GTA---CAAA-----GGTGCTGC
gi930068990/1-487 AACGTGTACTACAACGTGCGACTACATCAACGACAA--GTA---CAAG-----GGTGCTGC
gi950655841/1-488 AACACCTACTACAACGTGACTACATCAACGACAA--GTA---CAAC-----GGTGCTGC
gi930068952/1-487 AACGTGTACTATGATGTAGACTACATCAACCAGAA--GTA---CAAC-----AATGCTGC
gi58615486/1-470 TTCACGTACTACGGATACGACTACGCACTGAACAA--GTA---CGGA-----GA-----
gi5616127/1-466 TTCACGTACTACGGATACGACTACGCACTGAAGAA--GTA---CGGA-----GA-----
gi82492006/1-464 TTCACCTACTTCGGTAAAGATTATGTTGAAGATAA--ATACGG---T-----GG-----
gi262358095/1-470 TTTACTTATTATGGTAAAGCTTATGTGCAAGCTAA--ATATGG---A-----GA-----
gi629633272/1-472 TTCACCTACTACGGTAAAGACTACGTGCAAGACAA--ATACGG---A-----GA-----
gi629633282/1-472 TTCACCTACTATGGTAAAGACTACGTGCAAGACAA--ATACGG---C-----GA-----
gi334085683/1-468 TTCACCTACTACGGTAAAGACTACGTAGAAGACAA--ATACGG---T-----GG-----
gi217792440/1-467 TTTGCTTACTATGGTAAAGATTATGTAGAAGATAA--ATATGG---T-----
gi498543114/1-395 -----GTAAAGATTATGTAGAAGATAA--ATATGG---T-----
gi629633278/1-472 TTCTCTTACTTCGGTAAAGATTATGTAGAAGACAA--ATACGG---T-----GG-----
gi145370874/1-445 TTCTTATACTATGGTAAAGAAATATGTGCAAGACAA--ATT-----T-----GG-----
gi311141403/1-440 TTCTTATACTATGGTAAAGAAATATGTGCAAGACAA--ATT-----T-----GG-----
gi629633284/1-466 TTCATTTATTATGGAATGGATTATGTGCAAAAGAA--TTA-----T-----GG-----
gi629633280/1-466 TTTATTTACTATGGAAGAAATATGTAGAGAAAAA--TTA-----T-----GG-----

```

```

gi309253887/1-472 ---AA-----ATGG-----AAAGGCA-----AAAGCCAC-----
gi930068978/1-469 ---TC-----TCGG-----CAAAGTTCCATGCAAG-----
gi930068946/1-466 ---AG-----CCGG-----CAAGGTACCATGCAAG-----
gi954036668/1-468 ---CA-----TCGG-----CAAGGCA-----AAGCACAC-----
gi930068996/1-469 ---CA-----TCGG-----AAAGGCA-----AAGTCAAC-----
gi428274410/1-489 ---CAGAACCCGAATCCAAACGA-----CAAGGTC-----AAGCCAAC-----
gi954036662/1-94 -----
gi954036666/1-486 AAATG-----TCGGCAAGGACAACAAGGTA-----AAGGCAAC-----
gi930068992/1-487 AAATA-----TAGGCAAGGACAATAAGGTA-----AAGGCAAC-----
gi930068990/1-487 AAACA-----TCGGCACGGACAACAAGGTA-----AAAGCAAC-----
gi950655841/1-488 AAACG-----TCGGTAAGGACAACAAGGTA-----AAGGCAAC-----
gi930068952/1-487 AACAG-----TCGGCAAGGACAACAAGGTA-----AAGGCAAC-----

```

gi58615486/1-470 ---AG-----ACGG-----AACC GCACCA  
gi5616127/1-466 ---AG-----ACGG-----AACAGCACCA  
gi82492006/1-464 ---AT-----TAAC-----TCAAGCA-----CCAAATAA-----  
gi262358095/1-470 ---GT-----TATG-----TGCAGCA-----CCTAACAA-----  
gi629633272/1-472 ---AT-----TATG-----CGCAGCA-----CCTAACAA-----  
gi629633282/1-472 ---CT-----TATG-----TTCCGCA-----CCTAACAA-----  
gi334085683/1-468 ---AT-----TAAC-----CGAAGCA-----CCTAACAA-----  
gi217792440/1-467 ---T-----TAAC-----CAAAGCA-----CCTAACAA-----  
gi498543114/1-395 ---T-----TAAC-----CAAAGCA-----CCTAACAA-----  
gi629633278/1-472 ---AT-----TATG-----TGAAGCT-----CCAAACAA-----  
gi145370874/1-445 ---AA-----TATG-----TGAAGCT-----CCAAACAA-----  
gi311141403/1-440 ---AA-----TATG-----TGAAGCT-----CCAAACAA-----  
gi629633284/1-466 ---GA-----TGTG-----TAATGCT-----GAATTAGA-----  
gi629633280/1-466 ---AA-----TGTG-----TCAGGCA-----GAAGCTAA-----

gi309253887/1-472 -----CATTGACACTGTAAAGGATATCGCTACAGAAACAACCTCTGTACGGTCTTGAAGCA  
gi930068978/1-469 -----CAGGACGCAGTCAACGATGTTGCAACTGAAGTCACCCTCTACGGTATGGAACAG  
gi930068946/1-466 -----CAGGACGCAGTCAACGATGTTGCAACTGAAGTCACGCTCTATGGTATGGAACAG  
gi954036668/1-468 -----CCAGGAAGTTATCAACGACATTGCAACCGAAACCACGCTCTACGGTATGGAACAG  
gi930068996/1-469 -----CCAGGAAGCAGTTACTGACATTGCAACCGAGGCTAACCTCTACGGTATGGAACAG  
gi428274410/1-489 -----CCAGGAAGTCGTCAACGACATTGCAAGCGAGGTCAACCTCAACGGTATGGAACAG  
gi954036662/1-94 -----  
gi954036666/1-486 -----CCTCGAAGTCGTAAAGGACATTGCAACCGAGTCCACACTCTACGGTATCGAGACC  
gi930068992/1-487 -----CCTCGACGTCGTAAAGGACATTGCAACCGAGTCCACACTCTACGGTATCGAGACC  
gi930068990/1-487 -----TCTCGAAGTCGTAAAGGACATTGCAACTGAGTCCACAATCTACGGTATCGAGACC  
gi950655841/1-488 -----CCTCGACGTCGTAAAGGACATCGCAACCGAATCCACAATCTACGGTATCGAGACC  
gi930068952/1-487 -----CCTCGAAGTCGTAAAGGACATCGCAACCGAGTCCACAATCTACGGTATCGAGACA  
gi58615486/1-470 AACGACCTTGCAACCGCAACCGACCTTGCAACCGAGGTTACCTTAAACGCTATGGAGTGC  
gi5616127/1-466 AACGACCTTGCAACCGCAACCGACCTTGCAACCGAGGTTACCTTGAACGGTATGGAGTGC  
gi82492006/1-464 -----TATGGATACTGTTTTAGATGTTGGTACTGAAGTTGCATTCTATGCATTAGAACAA  
gi262358095/1-470 -----CATGGATACTGTACTTGTATGTAGGTACTGAAGTAGCATTCTACGCATTAGAACAA  
gi629633272/1-472 -----CATGGACACCGTTCCTTGATGTAGGTACTGAAGTAGCATTCTACGCATTAGAACAA  
gi629633282/1-472 -----CATGGACACTGTTTTAGATGTTGGTACTGAAGTAGCATTCTACGCATTAGACCAA  
gi334085683/1-468 -----CATGGACACTGTTCTTGATGTAGGTACTGAAGTTACTTCTACTCCTTAGAACAA  
gi217792440/1-467 -----CATGGACACTGTTCTTGATGTGGTTCGAAGTTACCTTCTACGGATTAGAACAA  
gi498543114/1-395 -----CATGGACACTGTTCTTGATGTGGTTCGAAGTTACCTTCTACGGATTAGAACAA  
gi629633278/1-472 -----CATGGACACTGTTCTTGATGTAGGTTCTGAAGTAGCATTCTACTCCTTAGAACAA  
gi145370874/1-445 -----CATGGACACTGTTCTTGATGTAGGTTCTGAAGTAACTTTCTATGGATTAGAACAA  
gi311141403/1-440 -----CATGGACACTGTTCTTGATGTAGGTTCTGAAGTAACTTTCTATGGATTAGAACAA  
gi629633284/1-466 -----TATGGATACTGTACGTGATATATCTACTGAAGTAACCTTTATGGTTTAGAACAG  
gi629633280/1-466 -----CTTTGATAATGTAAAGGATATTGCTACTGAAGTTACAATTTATGGTTTAGAACAG

gi309253887/1-472 TACGAGAAATACCCAACCACACTGGAAGACCATTTCGGTGTTTCACAGAGAGCAACAGTC  
gi930068978/1-469 TACGAGCAGTACCCGACTGCACCTCGAGAGCCACTTCGGTGGGTCACAGCGTGCATCCGTC  
gi930068946/1-466 TACGAGCAGTACCCGACTGCACCTCGAGAGCCACTTCGGTGGGTCACAGCGTGCATCCGTA  
gi954036668/1-468 TACGAACAGTACCCGACCACCCTCGAGAGCCACTTCGGCGGTTCCAGCGTGCATCCGTC  
gi930068996/1-469 TACGAACAGTACCCGACCAGCCTCGAGAGCCACTTCGGCGGTTCCAGCGTGCATCCGTC  
gi428274410/1-489 TACGAACAGTACCCGACCATGCTTGAAGACCATTTCGGTGGGTCACAGCGTGCAAGTGTC  
gi954036662/1-94 -----  
gi954036666/1-486 TACGAAAAGTTCCCAACTGCCCTTGAAGACCATTTCGGTGGGTCCAGAGAGCAACCGTG  
gi930068992/1-487 TACGAAAAGTTCCCAACTGCCCTTGAAGACCATTTCGGTGGGTCCAGAGAGCAACCGTG  
gi930068990/1-487 TACAAGAAGTTCCCGACTGCCCTTGAAGACCATTTCGGTGGGTCCAGAGAGCAACCGTG  
gi950655841/1-488 TACGAGAAGTTCCCGACTGCCCTTGAAGACCATTTCGGAGGTTCCAGAGAGCAACCGTG  
gi930068952/1-487 TACGAGAAGTTCCCAACAGCCCTTGAAGACCATTTCGGTGGGTCCAGAGAGCAACCGTG  
gi58615486/1-470 TACGAGGACTACCCAACGCTTCTTGAGGACCATTTCGGTGGGTCCGAGCGTGCAGGTGTC  
gi5616127/1-466 TACGAGGACTACCCAACGCTTCTTGAGGACCATTTCGGTGGGTCCGAGAGCGGGAATC  
gi82492006/1-464 TACGAAGAATACCCAGCATTA CTGAAACTCACTTCGGTGGGATCTCAAAGATCATCTGTT  
gi262358095/1-470 TATGAAGAATATCCGGCATTACTCGAAACTCACTTTGGCGGATCTCAAAGATCTTCAGTT  
gi629633272/1-472 TACGAAGAATACCCAGCTTTACTTGAAACTCACTTCGGTGGGATCTCAAAGAGCTTCCGTT  
gi629633282/1-472 TACGAAGAATACCCAGCTTTACTTGAAACTCACTTCGGTGGGATCTCAAAGAGCTTCCGTT  
gi334085683/1-468 TACGAAGAATACCCAGCTTTACTCGAAACTCACTTCGGTGGGATCTCAAAGAGCTTCCGTT  
gi217792440/1-467 TATGAAAAATTCCTGCATTACTTGAAACTCAATTTCGGTGGGATCCCAAAGGGCTGCTGTT  
gi498543114/1-395 TATGAAAAATTCCTGCATTACTTGAAACTCAATTTCGGTGGGATCCCAAAGGGCTGCTGTT  
gi629633278/1-472 TACGAAGAATACCCAGCTTTACTTGAAACTCACTTCGGTGGGTCTCAAAGAGCTGCTGTT  
gi145370874/1-445 TACGAAGAATATCCTGCATTACTTGAAACTCAATTTCGGTGGGTCTCAAAGAGCATCTGTT  
gi311141403/1-440 TACGAAGAATATCCTGCATTACTTGAAACTCAATTTCGGTGGGTCTCAAAGAGCATCTGTT  
gi629633284/1-466 TATGAG--ATACCTA-CTCTTTTAGAAACTCACTTTGGTGTTCTCAAAGAGCATCAGTT  
gi629633280/1-466 TACGAA--ATCCCAA-CATTACTTGAAGACCATTTCGGTGGGTCTCAAAGAGCATCGGTT

gi309253887/1-472 ATATCAATTGCAGCAGGCG---GCGCAACAGCTCT-----G-----GCAACA  
gi930068978/1-469 CTTGCC---GCAG-----CAGCAGGTCT-----GACCACCTCACTCGGTACC  
gi930068946/1-466 CTTGCA---GCAG-----CATCAGGTCT-----GTCCTGTTCACTCGGTACC  
gi954036668/1-468 CTTGCA---GCAG-----CATCAGGTAT-----CTCCTGTTCACTCGCAACC  
gi930068996/1-469 CTTGCA---GCAG-----CATCAGGTAT-----CTCCTGTTCACTGGCAACT  
gi428274410/1-489 CTCGCA---GCAG-----CATCCGGTAT-----CTCCACCTCAATTGCAACC  
gi954036662/1-94 -----  
gi954036666/1-486 CTTGCA---GCAG-----CAGCCGGTGTCTGTACTGCA-----ATCGCAACC  
gi930068992/1-487 CTCGCA---GCTG-----CAGCCGGTGT-----TGCATGTTCCCTTGCAACC  
gi930068990/1-487 CTCGCA---GCCG-----CAGCCGGTGT-----CGCATGTTCCCTCGCAACC  
gi950655841/1-488 CTCGCA---GCCG-----CAGCCGGTGT-----CGCAACTGCCCTCGCAACC  
gi930068952/1-487 CTCGCA---GCCG-----CAGCCGGTGT-----TGCATGCGCCCTCGGAACT  
gi58615486/1-470 ATGGCA---GCAGCAAGCGCATGCACAACCGGTAT-----T-----GCTACC  
gi5616127/1-466 CTTGCA---GCAGCAAGCGCATGCACAACCGGTAT-----T-----GCTACC  
gi82492006/1-464 ATTTCA---GCAGCAGCTGGTGCTTCAACTGCATT-----T-----GCTACT  
gi262358095/1-470 ATTTCA---GCAGCAGCTGGTGCTTCCACTGCATT-----C-----GCTACT  
gi629633272/1-472 GTTTCC---GCAGCTGCAGGTGTGTTCCACTGCATT-----C-----GCTACT  
gi629633282/1-472 ATTTCC---GCAGCTGCTGGTTGTTCCACTGCATT-----C-----GCTACT  
gi334085683/1-468 GTTTCC---GCAGCTGCTGGTTGTTCCACTGCATT-----C-----GCTACT  
gi217792440/1-467 GTTGCA---GCTGCTGCAGGTATTTCAACTGCATT-----T-----GCTACT  
gi498543114/1-395 GTTGCA---GCTGCTGCAGGTATTTCAACTGCATT-----T-----GCTACT  
gi629633278/1-472 ATTTCC---GCAGCTTCCGGTATTTCCACTGCATT-----T-----GCAACA  
gi145370874/1-445 GTTTCA---GCCGCTGCTGGTTGTGCAACAGCTTT-----C-----GCTACT  
gi311141403/1-440 GTTTCA---GCCGCTGCTGGTTGTGCAACAGCTTT-----C-----GCTACT  
gi629633284/1-466 ATTTCC---GCCGCTGCAGGTGTGTTCAACTGCCTT-----T-----GCAACA  
gi629633280/1-466 ATTTCC---GCAGCTGCAGGTATTTCTGTAGCATT-----T-----GCAACA

gi309253887/1-472 GGCCACAGCCAGGCCGGTCTCTCTGCATGGTACCTGTCCATGTATCCCCACAAAGAGGCA  
gi930068978/1-469 GGAAACTCCAATGCCGGTCTGAATGGCTGGTACCTGTCCATGCTCCTGCACAAGGAAGGC  
gi930068946/1-466 TGCAACTCGAATGCAGGTCTGCACGGATGGTACATGTGATGCTCCTGCACAAGGAAGGA  
gi954036668/1-468 GGAAACTCGAACGCTGGCCTGAACGGCTGGTACATGTCCATGCTTGCCACAAAGGAAGGC  
gi930068996/1-469 GCAAACTCAAATGCAGGCCGTAACGGCTGGTACTTGTGATGCTTATGCACAAGGAAGGC  
gi428274410/1-489 GGCAACTCAAATGCCGGTCTGAACGGCTGGTACCTCTCGATGCTCATGCACAAAGAGGGA  
gi954036662/1-94 -----  
gi954036666/1-486 GCAAAACGCAAAATGCCGGTCTCTCCGGCTGGTACCTCTCCATGTACCTGCACAAGGAAGCA  
gi930068992/1-487 GCAAAACGCAAAATGCAGGTCTCTCCGGCTGGTACCTCTCCATGTACCTGCACAAGGAAGCA  
gi930068990/1-487 GCAAAACGCAAAATGCTGGTCTCTCTGGCTGGTACCTCTCCATGTACCTGCACAAGGAAGCA  
gi950655841/1-488 TCAAAACGCCAATGCCGGACTCTCAGGCTGGTACCTCTCCATGTACCTGCACAAGGAAGCA  
gi930068952/1-487 GCAAAACGCCAAGCCGGTCTCTCAGGCTGGTACCTTTCCATGTACCTGCACAAGGAAGCA  
gi58615486/1-470 GGTAACGCACAGGTGCGCTCTCCGGATGGTACATGTGATGTACCTGCACAAGGAAGGC  
gi5616127/1-466 GGAAACGCACAGGTGCGCTGTCTGCATGGTGCATGTGATGTACCTGCACAAGGAAGGC  
gi82492006/1-464 GGTAATGCTCAAACCTGGTTTAAAGTGCATGGTACTTATCTATGTATTTACACAAGGAACAA  
gi262358095/1-470 GGTAATGCTCAAACCTGGTTTGAAGTGCATGGTACTTGTCCATGTACTTGCAAAAGAACAA  
gi629633272/1-472 GGTAATGCACAAACTGGTTTAAAGCGCATGGTACTTAGCTATGTACTTACACAAGGAACAA  
gi629633282/1-472 GGTAATGCACAAACTGGTTTAAAGTGCATGGTACTTAGCTATGTACTTACACAAGGAACAA  
gi334085683/1-468 GGTATATGCACAAACTGGTTTAAAGCGCATGGTACTTAGCTATGTACTTACACAAGGAACAA  
gi217792440/1-467 GGAAATGCTCAAACCTGGTTTAAAGTGCATGGTACTTATCTCAATACTTACACAAGGAACAA  
gi498543114/1-395 GGAAATGCTCAAACCTGGTTTAAAGTGCATGGTACTTATCTCAATACTTACACAAGGAACAA  
gi629633278/1-472 GGTAATGCACAAACTGGTTTATGCTATGGTACTTAGCACAATACTTACACAAGGAACAA  
gi145370874/1-445 GGAAACTCCCAAACTGGTTTAAAGCGCATGGTATTTATCTATGTACTTACACAAGGAACAA  
gi311141403/1-440 GGAAACTCCCAAACTGGTTTAAAGCGCATGGTATTTATCTATGTACTTACACAAGGAACAA  
gi629633284/1-466 GGAAATTCCAATGCTGGTGTAAATGGATGGTATTTAAGTATGATTTTACATAAAGAAGCT  
gi629633280/1-466 GGAAACTCTAATGCAGGAGTAAATGGTTGGTATCTCAGTATGATTGAACATAAAGAAGCT

gi309253887/1-472 CACGGCAGACTCGGATTCTACGGGTATGACCTGCAGGATCAGTGCGGTGCAACGAACGTG  
gi930068978/1-469 TGGTCACGTCTCGGCTTCTTCGGCTACRACCTGCAGGACCAGTGTGGTTCCGCAAACTCG  
gi930068946/1-466 TGGCCACGTCTCGGCTTCTTCGGCTACAACCTGCAGGACCAGTGCGGTTCGCAAACTCG  
gi954036668/1-468 TGGTCACGTCTCGGCTTCTTCGGTTACGACCTGCAGGACCAGTGCGGTTCAGCAAACTCA  
gi930068996/1-469 TGGTCACGTCTCGGCTTCTTCGGCTACGACCTGCAGGACCAGTGCGGTTCGCAAAACACC  
gi428274410/1-489 TGGTCACGTCTCGGATTCTTCGGCTACGACCTGCAGGACCAGTGCGGTTCAGCAAAACACC  
gi954036662/1-94 -----  
gi954036666/1-486 TGGGGCCGTCTCGGCTTCTTCGGATACGACCTGCAGGATCAGTGCGGTGCCACAATGTT  
gi930068992/1-487 TGGGGCCGTCTCGGCTTCTTCGGATACGACCTGCAGGATCAGTGCGGTGCCACAATGTT  
gi930068990/1-487 TGGGGCCGTCTCGGCTTCTTCGGATACGACCTGCAGGACCAGTGCGGTGCCACAATGTT  
gi950655841/1-488 TGGGGCAGACTTGGATTCTTCGGATTTCGACCTGCAGGACCAGTGCGGTGCTACAAACGTT  
gi930068952/1-487 TGGGGCCGTCTCGGCTTCTTCGGTTTCGACCTGCAGGACCAGTGCGGTGCCACAACGTT  
gi58615486/1-470 TGGGGCAGACTCGGATTCTTCGGGTACGACCTGCAAGACCAGTGCGGTGCAACCAACGTG

gi5616127/1-466 TGGGGACGACTCGGATTCTTCGATACGACTTGCAGGATCAGTGCGGTGCAACCAACGTC  
gi82492006/1-464 CATTCCAGATTAGGTTTCTATGGTTTCGATTTACAAGATCAATGTGGTGCTGCTAACGTA  
gi262358095/1-470 CATTCCAGATTAGGATTCTATGGTTTCGATTTACAAGATCAATGTGGTGCTGCTAACGTA  
gi629633272/1-472 CACTCCAGATTAGGATTCTACGGTTTCGATTTACAAGACCAATGTGGTGCTGCTAACGTA  
gi629633282/1-472 CACTCCAGATTAGGATTCTACGGTTTCGATTTACAAGATCAATGTGGTGCTGCTAACGTA  
gi334085683/1-468 CACTCCAGATTAGGATTCTACGGTTTCGATTTACAAGATCAATGTGGTGCTGCTAACACT  
gi217792440/1-467 CATTCCAGATTAGGTTTCTATGGTTACGATTTACAAGATCAATGTGGTGCTGCTAACACA  
gi498543114/1-395 CATTCCAGATTAGGTTTCTATGGTTACGATTTACAAGATCAATGTGGTGCTGCTAACACA  
gi629633278/1-472 CATTCCAGATTAGGATTCTATGGTTACGACTTACAAGACCAATGTGGTGCTGCTAACGTA  
gi145370874/1-445 CACTCTAGATTAGGATTCTATGGTTACGATTTACAAGATCAATGTGGTGCTGCTAACGTA  
gi311141403/1-440 CACTCTAGATTAGGATTCTATGGTTACGATTTACAAGATCAATGTGGTGCTGCTAACGTA  
gi629633284/1-466 CATTCCAGACTTGGATTTTATGGATATGATTTACAAGACCAAGCAGGTGCTTCTAATTCA  
gi629633280/1-466 CACAGCAGATTAGGATTCTATGGTTACGATTTACAAGACCAATGTGGTGCTGCTAATTCA

gi309253887/1-472 TTCTCAATTGCATCA----GATGAAG-----GC-----TGTGTAGGCGAATGCGGAG  
gi930068978/1-469 ATGGC----CATCAAAGGCGACGAGG-----GT-----TGTATCGGAGAACTCCGTG  
gi930068946/1-466 ATGGC----CATCAAAGGCGACGAGG-----GT-----TGTATCGGAGAACTCCGTG  
gi954036668/1-468 ATGTC----CGTCCGGCCCCGACGAGG-----GC-----TGTATCGGCGAGCTCCGTG  
gi930068996/1-469 GAGTC----CTACAGGGCAGACGAAG-----GC-----TGTGTGCGGAGAGCTCCGTG  
gi428274410/1-489 CTCTC----TGTCCGGCCTGACGAAG-----GC-----TGTATCGGCGAGTTCCGTG  
gi954036662/1-94 -----  
gi954036666/1-486 CTGTC----CTACCAGGGCGACGAAG-----GT-----CTCCAGACGAACTCCGTG  
gi930068992/1-487 CTGTC----CTACCAGGGCGACAAAG-----GT-----CTCCAGACGAACTCCGTG  
gi930068990/1-487 CTGTC----CTACCAGGGCGACGAG-----GT-----CTCCAGACAAACTCCGTG  
gi950655841/1-488 CTGTC----CTACCAGGGCGACGAAG-----GT-----CTTCAAACGAACTCCGTG  
gi930068952/1-487 CTGTC----CTACCAGGGCGACGAAG-----GT-----CTCCAGACGAACTCCGTG  
gi58615486/1-470 TGCTC----GTACCAGGGCGATCAGG-----GCGAGTGCCT-----CGAACTCCGTG  
gi5616127/1-466 TGCTC----GTACCAAGGTGACCAGGATGCTGC-----TGAGCTTCGTG  
gi82492006/1-464 TTCTCTATCAGAAAC---GATGAAG---GT-----ATACCACTTGAAATGAGAG  
gi262358095/1-470 TTCTCCATCAGAAAC---GATGAAG---GA-----TTGCCACTTGAAATGAGAG  
gi629633272/1-472 TTCTCCATCAGAAAC---GATGAAG---GA-----TTACCACTCGAAATGAGAG  
gi629633282/1-472 TTCTCCATCAGAAAC---GATGAAG---GA-----TTACCACTCGAAATGAGAG  
gi334085683/1-468 TTCTCCATCAGAAAC---GATGAAG---GT-----TTACCACTCGAAATGAGAG  
gi217792440/1-467 TTCTCCTTCAGAAAT---GATGAAG---GT-----TTACCTCTTGAAATGAGAG  
gi498543114/1-395 TTCTCCTTCAGAAAT---GATGAAG---GT-----TTACCTCTTGAAATGAGAG  
gi629633278/1-472 TTCGCTATTAGAAAC---GACGAAG---GT-----TTACCACTTGAAATGAGAG  
gi145370874/1-445 TTCTCTATAAGAAAT---GACGAAG---GA-----TTACCACTTGAAATGAGAG  
gi311141403/1-440 TTCTCTATAAGAAAT---GACGAAG---GA-----TTACCACTTGAAATGAGAG  
gi629633284/1-466 TTATCAATTAGGAGT---GATGAAG---GT-----CTTATCCATGAATTAAGAG  
gi629633280/1-466 TTATCTATTAGAAGT---GATGAAG---GA-----TTAATTCATGAATTAAGAG

gi309253887/1-472 GCGCAAACCTACCC-CAACTACGCCATGAA-CG  
gi930068978/1-469 GACCAAACCTACCC-CAACTACGCCATGA----  
gi930068946/1-466 GACCAAACCTACCC-CAACTATGCCA-----  
gi954036668/1-468 GACCGAACTACCC-TAACTACGCAATG-----  
gi930068996/1-469 GAGCCAACTATCC-CAACTATGCAATGA----  
gi428274410/1-489 GACCGAACTACCC-CAACTATGCCATA-----  
gi954036662/1-94 -----  
gi954036666/1-486 GTCCAAACTATCC-CAACTACGCCATG-----  
gi930068992/1-487 GTCCAAACTACCC-TAACTACGCCCTGA----  
gi930068990/1-487 GTCCAAACTACCC-CAACTACGCCCTGA----  
gi950655841/1-488 GTCCAAACTATCC-AAACTACGCCATGAA---  
gi930068952/1-487 GTCCAAACTACCC-CAACTACGCCATGA----  
gi58615486/1-470 GCGCAAACCTACCCCAACTACGCNATGA----  
gi5616127/1-466 GCGCAAACCTACCC-TAACTACGCCATGA----  
gi82492006/1-464 GTCCTAATATCC-TAACTACGC-----  
gi262358095/1-470 GGCCAAACTACCC-AAACTACGCAATGAA---  
gi629633272/1-472 GACCAAACCTATCC-TAACTACGCAATGAA-CG  
gi629633282/1-472 GACCAAACCTATCC-TAACTACGCAATGAA-TG  
gi334085683/1-468 GTCCTAATATCC-CAACTACGCCATA-----  
gi217792440/1-467 GACCTAATATCC-TAACTACGCAATGAA---  
gi498543114/1-395 GACCTAATATCC-TAACTACGCAATGAAA--  
gi629633278/1-472 GACCTAATATCC-TAACTATGCAATGAA-TG  
gi145370874/1-445 GACCAA-----  
gi311141403/1-440 G-----  
gi629633284/1-466 GTCCTAATTATCC-TAATTATGCAATGAA-TG  
gi629633280/1-466 GGCCTAATATCC-TAACTATGCAATGAA-TG
