# Supplementary material for: Improved Quantitative Real-Time PCR Protocol for Detection and Quantification of Methanogenic Archaea in Stool Samples
Source: MDPI journal article supplement (doi:10.3390/microorganisms11030660), 2023-03-05
Supplement: s1 [file s1]

## CLUSTAL

Methanopyrus\_sp.\_8\_510\_KC18341.1/1-477  
Methanomassilicoccus\_luminis1\_456\_strain\_B10\_HQ896500.1/1-455  
Methanopyrus\_kandleri\_1\_414\_AY414042.1/1-414  
Methanosarcina\_mazei\_MH004454.1\_RCompl\_1\_433/1-433  
Methanosarcina\_horonobensis\_256\_737\_AB288266.1/1-466  
Methanosarcina\_subterranea\_259\_740\_AB288268.1/1-466  
Methanolobus\_oregonensis\_1\_490\_U22242.1/1-474  
Methanolobus\_zinderi\_256\_745\_EU715818.1\_RCompl/1-474  
Methanolobus\_taylorii\_1\_490\_U22243.1/1-474  
Methanolobus\_profundi\_687\_1168\_AB703629.1/1-466  
Methanolobus\_vulcani\_1\_490\_U22245.1/1-474  
Methanocella\_conradii\_1\_465\_JN081865.1/1-450  
Methanocella\_sp.\_279\_692\_KJ441441.1/1-398  
Methanocella\_paludicola\_240\_681\_AB300467.1/1-426  
Methanomicrobium\_mobile\_1\_438\_AF414044.1/1-438  
Methanoculleus\_marisnigri\_RCompl\_1\_436\_MH004450.1/1-436  
Methanoculleus\_palmolei\_259\_743\_AB300784.1/1-469  
Methanoculleus\_bourgenis\_259\_743\_AB300787.1/1-469  
Methanoculleus\_chikugoensis\_259\_743\_AB300779.1/1-469  
Methanogenium\_organophilum\_1\_501\_DQ229160.1/1-487  
Methanogenium\_boonei\_15\_520\_DQ229161.1/1-490  
Methanogenium\_cariaci\_1\_433\_DQ229157.1/1-420  
Methanobacterium\_sp.\_1\_452\_JQ917190.1/1-452  
Methanobrevibacter\_smithii\_1\_423\_GU385700.1/1-423  
Methanobrevibacter\_oralis\_1\_414\_LK054628.1/1-414  
Methanobrevibacter\_ruminantium/1-470  
Methanobrevibacter\_sp.\_D5\_mcrA\_plasmid\_365\_874\_KF214818.1/1-488  
Methanobrevibacter\_gottschalkii\_1\_471\_EU919431.1/1-471  
Methanobrevibacter\_boviskoreani\_1\_424\_KC865050.1/1-424  
Methanobrevibacter\_woesei\_1\_467\_EU919432.1/1-467  
Methanobrevibacter\_wolinii\_1\_395\_KC865051.1/1-395  
Methanobrevibacter\_arboriphilus\_1\_414\_AF414035.1/1-414  
Methanobacterium\_movs\_673\_1133\_HM802934.1/1-445  
Methanobacterium\_thermaggregans\_1\_440\_AY289750.1/1-440  
Methanothermobacter\_wolfelii\_259\_719\_AB300780.1/1-445  
Methanothermobacter\_tenebrarum\_259\_723\_AB523786.1/1-449  
Methanothermobacter\_crinale\_18\_503\_HQ283274.1/1-470  
Methanobacterium\_aggregans\_690\_1116\_KP006500.1/1-411  
Methanobacterium\_aarhusense\_650\_1124\_AY386125.1/1-459  
Methanobacterium\_bryantii\_259\_719\_AY313806.1/1-445  
Methanococcus\_voltae\_5430\_5930\_X07793.1/1-485  
Methanothermococcus\_thermolithot\_1\_414\_AF414048.1/1-414  
Methanococcus\_maripaludis\_684\_1144\_AB703637.1/1-445  
Methanococcus\_vannielii\_4514\_5014\_M16893.1/1-485  
Methanococcus\_aeolicus\_1\_464\_AY354034.1/1-464  
Methanosphaera\_sp.\_1\_464\_FJ982887.1/1-464  
Methanosphaera\_stadtmanae\_1\_414\_AF414047.1/1-414

Methanopyrus\_sp.\_18\_510\_KC1818341.1/1-477  
Methanomassiliicoccus\_luminyensis\_1\_456\_strain\_B10\_HQ896500.1/1-455  
Methanopyrus\_kandleri\_1\_414\_AF414042.1/1-414  
Methanosarcina\_mazei\_MH004454.1\_RComp1\_1\_433/1-433  
Methanosarcina\_horonobensis\_256\_737\_AB288266.1/1-466  
Methanosarcina\_suterranea\_259\_740\_AB288268.1/1-466  
Methanolobus\_oregonensis\_1\_490\_U22242.1/1-474  
Methanolobus\_zinderi\_256\_745\_EU715818.1\_RComp1/1-474  
Methanolobus\_taylorii\_1\_490\_U22243.1/1-474  
Methanolobus\_profundi\_687\_1168\_AB703629.1/1-466  
Methanolobus\_vulcani\_1\_490\_U22245.1/1-474  
Methanocella\_conradii\_1\_465\_JN081865.1/1-450  
Methanocella\_sp.\_279\_692\_KJ441441.1/1-398  
Methanocella\_paludicola\_240\_681\_AB300467.1/1-426  
Methanomicrobium\_mobile\_1\_438\_AF414044.1/1-438  
Methanoculleus\_marisnigri\_RComp1\_1\_436\_MH004450.1/1-436  
Methanoculleus\_palmolei\_259\_743\_AB300784.1/1-469  
Methanoculleus\_bourgenensis\_259\_743\_AB300787.1/1-469  
Methanoculleus\_chikugoensis\_259\_743\_AB300779.1/1-469  
Methanogenium\_organophilum\_1\_501\_DQ229160.1/1-487  
Methanogenium\_boonei\_15\_520\_DQ229161.1/1-490  
Methanogenium\_cariaci\_1\_433\_DQ229157.1/1-420  
Methanobacterium\_sp.\_1\_452\_JQ917190.1/1-452  
Methanobrevibacter\_smithii\_1\_423\_GU385700.1/1-423  
Methanobrevibacter\_oralis\_1\_414\_LK054628.1/1-414  
Methanobrevibacter\_ruminantium/1-470  
Methanobrevibacter\_sp.\_D5\_mcrA\_plasmid\_365\_874\_KF214818.1/1-488  
Methanobrevibacter\_gottschalkii\_1\_471\_EU919431.1/1-471  
Methanobrevibacter\_govisskoreani\_1\_424\_KC865050.1/1-424  
Methanobrevibacter\_woesei\_1\_467\_EU919432.1/1-467  
Methanobrevibacter\_vinnii\_1\_395\_KC865051.1/1-395  
Methanobrevibacter\_arboriphilus\_1\_414\_AF414035.1/1-414  
Methanobacterium\_movens\_673\_1133\_HM802934.1/1-445  
Methanobacterium\_thermaggrens\_1\_440\_AY289750.1/1-440  
Methanothermobacter\_wolfi\_259\_719\_AB300780.1/1-445  
Methanothermobacter\_tenebrarum\_259\_723\_AB253786.1/1-449  
Methanothermobacter\_crinale\_18\_503\_HQ283274.1/1-470  
Methanobacterium\_aggregans\_690\_1116\_KP006500.1/1-411  
Methanobacterium\_aarhusense\_650\_1124\_AY386125.1/1-459  
Methanobacterium\_bryantii\_259\_719\_AY313806.1/1-445  
Methanococcus\_voltae\_5430\_5930\_X07793.1/1-485  
Methanothermococcus\_thermolithot\_1\_414\_AF414048.1/1-414  
Methanococcus\_maripaludis\_684\_1144\_AB703637.1/1-445  
Methanococcus\_vannielii\_4514\_5014\_M16893.1/1-485  
Methanococcus\_aeolicus\_1\_464\_AY354034.1/1-464  
Methanosphaera\_sp.\_1\_464\_FJ982887.1/1-464  
Methanosphaera\_stadtmanae\_1\_414\_AF414047.1/1-414

Methanopyrus\_sp.\_18\_510\_KC618341.1/1-477  
Methanomassiliicoccus\_luminyensis\_1\_456\_strain\_B10\_HQ896500.1/1-455  
Methanopyrus\_kandleri\_1\_414\_AF414042.1/1-414  
Methanosarcina\_mazei\_MH004454.1\_RCompl\_1\_433/1-433  
Methanosarcina\_horobonensis\_256\_737\_AB288266.1/1-466  
Methanosarcina\_suterranea\_259\_740\_AB288268.1/1-466

GGTGGAGT - CGGATT - CACACAGTATGCTACAGCGGCTTACACCGAGCATCTCTGGAGG  
GGTGGTGT - AGGATT - CACACAGTATGCTACAGCGGCTTACACCGAGCATCTCTGGAGG  
-----TACACTGTACAACATCTCTGGAGC-----  
-----TGCATACACAGCATCTCTGGGCA-----  
GGTGGTGT - CGGGTT - CACACAGTATGCAACAGCTGCATACACTGATGACATCTCTGACA  
GGTGGTGT - CGGGTT - CACACAGTATGCAACAGCTGCATACACTGATGACATCTCTGACA  
GGTGGTGT - AGGTTT - CACACAGTACGCTACACGAGGTTTACCGAACCAACATCTCTGATG  
GGTGGTGT - AGGTTT - CACCCAGTAGCGCAACAGCAGCATACTGTAAACAACATCTCTGATG  
GGTGGTGT - CGGCTT - CACCCAGTAGCGCAACAGCAGCATACTGTAAACAACATCTCTGATG  
GGTGGTGT - AGGTTT - CACCCAGTAGCGCAACAGCAGCATACTGTAAACAACATCTCTGACG  
GGTGGTGT - GGGCTT - CACCGAGTAGCGCAACCGCGCATACACCGATGACATCTCTGGATG  
GGTGGTGT - CGGCTT - CACCGAGTAGCGCAACCGCGCTTACACCGATGACATCTCTGGATG  
GGTGGTGT - CGGCTT - CACCGAGTAGCGCAACCGCGCTTACACCGATGATCTCTGGATG  
-----TACACGGTACAACATCTCTTGATG-----  
-----GGCTTACCGGACAACATCTCTGATG-----  
GGCGGTGT - CGGCTT - CACCGAGTAGCGCATCTGAGCTTACCGGACAACATCTCTGATG  
GGCGGTGT - CGGATT - CACCCAGTAGCGCAACCGCGCTTACACCGACAACATCTCTGATG  
GGCGGTGT - CGGATT - CACCCAGTAGCGCAACCGCGCTTACACCGACAACATCTCTGACG  
GGTGGTGT - CGG - TT - CACCCAGTAGTCTACTGCGAGCATACACCGATGACATCTCTGATG  
GGTGGTGT - CGG - TT - CACCGAGTAGCGCAACAGCAGCATACACCGTACAACATCTCTGATG  
GGTGGTGT - CGG - TT - CACCCAGTAGTCAACCGGAGCATACACCGAT - ACATCTCTGATG  
-----TT - CACCCAGTAGTCAACCGCGAGCTTACACTGACGATATCTTGAGCG-----  
GTGGTGTGTTCTGGATT - CACACAGTATGCAACAGCAGCATATACTGATGATGTATTAGATG  
-----GCATATCTGATAATGTATTAGATG-----  
GGTGGTGT - AGGATT - TACTCAATATGCTACCGCAGCATACACCGTACAGTATTATTAGACG  
GGTGGTGT - AGGATT - CACACAATATGCTACTGCGAGCATACACTGATAATGTATTAGACG  
GGTGGTGT - AGGATT - CACACAGTATGCAACAGCTGCATACACAGATAATGTATTAGATG  
-----CTTCTTGATG-----  
GGTGGTGT - AGGATT - CACACAGTATGCTACAGCAGCATATACTGATAATGTCTTGATG  
-----  
-----TACACTGACAATATTCTGGAGC-----  
GGTGGTGT - AGGATT - CACTCAATACGGCAACCGCTGCTTACACTGACAACATCTCTGATG  
GGTGGTGT - AGGATT - CACCCAGTAGCGCAACAGCAGCTTACCGGACAACATCTCTGACG  
GGTGGTGT - TGGATT - CACCCAGTAGCGCAACAGCAGCTTACAGACAACATCTCTGATG  
GGTGGTGT - AGGATT - CACACAATATGCTAACAGCAGCATACACAGACAACATCTTAGACG  
GGTGGTGT - AGGATT - CACACAATATGCTACAGCAGCATACACAGACAACATCTTAGACG  
GGTGGTGT - TGGATT - CACACAGTAGCGCAACAGCTGCTTACACTGACAACATCTCTGACG  
GGTGGTGT - AGGATT - CACACAATATGCTACCGCAGCATACACCGACATCTCTGAGG  
GGTGGTGT - AGGATT - CACTCAGTAGCTACAGCAGCATACACTGATAATATTCTTGATG  
GGTGGTGT - AGGATT - CACACAATATGCTACAGCATCATACAGATGACATCTTAGATG  
-----TACACCGACAGCATCTTAGACG-----  
GGTGGTGT - AGGATT - CACTCAATACGCTACCGCATATACACCGACAGTATCTTAGATG  
GGTGGGT - AGGTTT - CACTCAATACTGCTACAGCAGCATACACCGAGTATCTTAGACG  
GGTGGTGT - CGGATT - CACACAGTATGCAACAGCAGCATACACTGATGACATCTTAGATG  
GGTGGTGT - CGGATT - CACACAATACGCAAGCGTAGCATACACAGTAAATCTTAGACG  
-----TACACAGTAAATATTAGATG-----

ACTACGCTCTACACATCTATCGACCTCATCAAGATGAGT --AC----- --GG-  
 ACTACACCTTACTGGGCTCTTGACCTGATCAAGACCAAGT --AC----- --GG-  
 ACTACGCTCTACACGCTTCAGGTCAGTGCAGGACAAGT --AC----- --GG-  
 ACAACACGTTCTATGACGTTGACTACATCAACGACAAGT --ACAACGGTGTGCAAA-  
 ACAACGCTGTACTACGACGTTGACTACATCAACGACAAGT --ACAACGGTGTGCAAA-  
 ACAACGCTGTACTATGACGTAGACTACATCAACGACAAGT --ACAACGGTGTGCAAA-  
 ACAACCTTTCTACACAACTTGACTATATCAACGACAAGT --ACAATGATGCAGCAAA-  
 ACAACCTCTACTACACGTTGACTACATCAACGACAAGT --ACGATGTGCAGCAAA-  
 ACAACCTCTCTACTACAACTTGACTACATCAACGACAAGT --ATGATGGTGCAGCAAA-  
 ACAACCTCTACTACAACTGAGACTACATCAACGACAAGT --ACGATGGTGCAGCAAC-  
 ACAACCTCTACTACAACTGTTGACTACATCAACGACAAGT --ACGATGGTGCAGCAAA-  
 ACTTCACCTTACTACGGCTATGACTATGCCAAGGGGCAAGT --AC----- --AA-  
 ACTTCACATACTATGGCTACGACTACGCCAAGGGGCAAGT --AC----- --AA-  
 ACTTCACCTTACTACGGTTATGACTACGCCAAGGGGCAAGT --AC----- --AA-  
 AGTTACCTTACTACGGTATGGACTACATTAAGACAAAT --AC----- --GG-  
 AGTACACCTTACTAGGTTATGGACTACATCAAGGACAAGT --AC----- --AA-  
 AATTACCTTACTACGGTATGGACTACATCAAGGACAAGT --AC----- --AA-  
 AGTTACCTTACTACGGTATGGACTACATCAAGGACAAGT --AC----- --AA-  
 AGTTACCTTACTACGGTATGGACTACATCAAGGACAAGT --AC----- --AA-  
 A-TTACCTTACTACGGTATGGACTACACTGAAAGACAAGT --AC----- --GA-  
 AGTACACCTTACTACGGTATGGACTACCTGAAGGACAAGT --AC----- --GG-  
 AGTACACCTTACTACGGTATGGACTACCTGAAAGGACAAGT --AC----- --GG-  
 ACTTTGTATCTACTATGGTATGGAATACGTGGGACGACAAAT --AC----- --GG-  
 ACTTTCTACTATGTTGTAAGATTACGTGAGAAGACAAAT --AT----- --GG-  
 ACTTTCATCTACTTCGGTAAAGATTATGTTGGAAGATAAT --AC----- --GG-  
 ACTTCTCTTACTTCGGTAAAGATTACGTGAGAAGACAAAT --AC----- --GG-  
 ACTTCACCTTACTACGGTAAAGACTACGTGGAAGACAAAT --AC----- --GG-  
 ACTTTCACCTTACTATGGTAAAGATTATGTTGGAAGACAAAT --AT----- --GG-  
 ACTTTACTTACTATGGTAAAGATTACGTGAGAAGATAAT --AT----- --GG-  
 ACTTTGCTTACTATGTTGTAAGATTATGTTGAGAAGATAAT --AT----- --GG-  
 -----GTAAAGATTATGTAGAAGATAAT --AT----- --GG-  
 ATTTCTTATATTATGGTAAAGAATATGTGGAAGACAAAT --TT----- --GG-  
 ACTTTACTTACTATGGTAAAGAATACGTGAGAAGACAAAT --TT----- --GG-  
 ACTTTCACCTTACTTCGGTAAAGAGTATGTTGGAAGACAAGT --AC----- --GG-  
 ACTTCCACCTTACTTCGGTAAAGAGTACGTGGAAGACAAAT --AT----- --GG-  
 ACTTTCACCTTACTTGGTAGAGAATACGTGGAAGACAAGT --AT----- --GGTG  
 ACTTTCACCTTACTATGGTAAAGATACGTGGAAGACAAGT --AT----- --GG-  
 ACTTCTGTCTACTACGGTAAAGAGTACGTGGAAGACAAATTCGGT --AC----- --GG-  
 ACTTTCACCTTACTATGGTAAAGATACGTGGAAGACAAAT --TC----- --GG-  
 ACTTTCACATATTTCGGTAGAGAATATGTGAGAAGACAAAT --AT----- --GG-  
 ACTTCTCATACTACGGTATCGAATACGTGAGAAGAAAAAT --AC----- --GG-  
 ACTTCGCATCTACCGGATACGAATACGTGAGAAGAAAAAT --AC----- --GG-  
 ACTTCTCATACTACGCACTCGACTACGTTGAGAAAAAAT --AC----- --GG-  
 ATTTCTCATCTACTACGCTTGACTACGTGAGAAGAAAAAT --AC----- --GG-  
 ATTTCTGCTACTATGGATTAGACTATGTGAGAAGAAAAAT --TC----- --GG-  
 ACTTTCATATCTACGGTAAAGACTACGTGAGAAGACAAAT --AC----- --GG-  
 ACTTCATTTACTATGGTAAAGACTACGTGAGAAGGTAAT --AT----- --GG-

-----CGGCTTCTGC-GGTGT-----  
-----CGGGCTCTGC-AAGAG-----  
-----AATCGCC-GAGGC-----  
-----CCTCGGAAGTGC-----  
-----CGTAGGCAAGGAC-----  
-----CATCGGCAAGGAC-----

Methanopyrus\_sp.\_18\_510\_KC618341.1/1-477  
Methanomassiliicoccus\_luminyensis\_1\_456\_strain\_B10\_HQ896500.1/1-455  
Methanopyrus\_kandleri\_1\_414\_AF414042.1/1-414  
Methanosarcina\_mazei\_MHO04454.1\_RComp1\_1\_433/1-433  
Methanosarcina\_horonobensis\_256\_737\_AB288266.1/1-466  
Methanosarcina\_subterranea\_259\_740\_AB288268.1/1-466  
Methanolobus\_oregonensis\_1\_490\_U22242.1/1-474  
Methanolobus\_zinderi\_256\_745\_EU715818.1\_RComp1/1-474  
Methanolobus\_taylorii\_1\_490\_U22243.1/1-474  
Methanolobus\_profundi\_687\_1168\_AB703629.1/1-466  
Methanolobus\_vulcani\_1\_490\_U22245.1/1-474  
Methanocella\_conradii\_1\_465\_JN081865.1/1-450  
Methanocella\_sp.\_279\_692\_KJ441441.1/1-398  
Methanocella\_paludicola\_240\_681\_AB300467.1/1-426  
Methanomicrobium\_mobile\_1\_438\_AF414044.1/1-438  
Methanoculleus\_marisnigri\_RComp1\_1\_436\_MH004450.1/1-436  
Methanoculleus\_palmolei\_259\_743\_AB300784.1/1-469  
Methanoculleus\_bourgensis\_259\_743\_AB300787.1/1-469  
Methanoculleus\_chikugoensis\_259\_743\_AB300779.1/1-469  
Methanogenium\_organophilum\_1\_501\_DQ229160.1/1-487  
Methanogenium\_boonei\_15\_520\_DQ229161.1/1-490  
Methanogenium\_cariaci\_1\_433\_DQ229157.1/1-420  
Methanobacterium\_sp.\_1\_452\_JQ917190.1/1-452  
Methanobrevibacter\_smithii\_1\_423\_QG385700.1/1-423  
Methanobrevibacter\_oralis\_1\_414\_LK054628.1/1-414  
Methanobrevibacter\_ruminantium/1-470  
Methanobrevibacter\_sp.\_D5\_mcrA\_plasmid\_365\_874\_KF214818.1/1-488  
Methanobrevibacter\_gottschalkii\_1\_471\_EU919431.1/1-471  
Methanobrevibacter\_boviskoreani\_1\_424\_KC865050.1/1-424  
Methanobrevibacter\_woesei\_1\_467\_EU919432.1/1-467  
Methanobrevibacter\_wolinii\_1\_395\_KC865051.1/1-395  
Methanobrevibacter\_arboriphilus\_1\_414\_AF414035.1/1-414  
Methanobacterium\_movens\_673\_1133\_HM802934.1/1-445  
Methanobacterium\_thermaggregans\_1\_440\_AY289750.1/1-440  
Methanothermobacter\_wolfeyi\_259\_719\_AB300780.1/1-445  
Methanothermobacter\_tenebrarum\_259\_723\_AB523786.1/1-449  
Methanothermobacter\_crinale\_18\_503\_HQ283274.1/1-470  
Methanobacterium\_aggregans\_690\_1116\_KP006500.1/1-411  
Methanobacterium\_aarhusense\_650\_1124\_AY386125.1/1-459  
Methanobacterium\_bryantii\_259\_719\_AF313806.1/1-445  
Methanococcus\_voltae\_5430\_5930\_X07793.1/1-485  
Methanothermococcus\_thermolithot\_1\_414\_AF414048.1/1-414  
Methanococcus\_maripaludis\_684\_1144\_AB703637.1/1-445  
Methanococcus\_vannielii\_4514\_5014\_M16893.1/1-485  
Methanococcus\_aeolicus\_1\_464\_AY354034.1/1-464  
Methanosphaera\_sp.\_1\_464\_FJ982887.1/1-464  
Methanosphaera\_stadtmanae\_1\_414\_AF414047.1/1-414

[illegible]

ACGATGAAGTCACTCGGTACGCACCTTGAGATGTACGAGAGATACCCGCGAGTCATGGAGA  
GCACCGAGATCAACTCTTACGCTCTGGAGATGTACGAGAGATACCCGCGCGCATGGAAA  
CCACGAGGTCAACCTGTACGGTCTGGAGCAGTACGAGCGGTACCCGGCGCGCATGGAGA  
CAACGAGTCCACACTCTATGGTATCGAGACCTACGAGAAATTCCTCAACGCCCTTGAAG  
CAACCGGAATCCACACTCTACGGTATCGAGACCTACGAGAAATTCCTCAAGCTGCCCTTGAAG  
CAACTGAGTCCACACTCTACGGTATCGAGACATACGAGAGAAGTCCCGACTGCCCTTGAAG  
CAACAGAGTCCACAATATATGGTCTTGAGAAATACGAGAAATACCCCAACAAACCTTGAGG  
CAACAGAGTCCACAATATACGGTCTCGAGAACTACGAGAAGTACCCCAACAACTCCGAAG  
CAACAGAAATCACTGTATACGGTCTTGAGAACTACGAGAAGTACCCCAACAACTCCGAAG  
CAACAGAGTCCAGACTCTACGGTCTCGAGAACTACGAGAAGTACCCCAACAACTCCGAAG  
CAACAGAGTCCACAATCTACGGTCTTGAGAACTACGAGAAATACCCCAACAACTCCGAAG  
GCACTGAGGTCAACCTGTACGGCATCGAGCAGTACGAGAAGTACCCGACCACTCCGAGG  
GCATCGAGTCAACCTGTATGGTATAGACGAGTACGAGAAGTACCCGACCACTCCGAGG  
CGACGGAAGTCAACCTGTATGGTATCGAGCAGTACGAGAAGTACCCGACCACTCCGAGG

Methanopyrus\_sp.\_28\_510\_KC618341.1/1-477  
Methanomassilicoccus\_luminisensis\_1\_456\_strain\_B10\_HQ896500.1/1-455  
Methanopyrus\_kandleri\_1\_414\_AF414042.1/1-414  
Methanosarcina\_mazei\_MH004454.1\_RCompl\_1\_433/1-433  
Methanosarcina\_horobonensis\_256\_737\_AB288266.1/1-466  
Methanosarcina\_subterranea\_259\_740\_AB288268.1/1-466  
Methanolobus\_oregonensis\_1\_490\_U22242.1/1-474  
Methanolobus\_zinderi\_256\_745\_EU715818.1\_RCompl/1-474  
Methanolobus\_taylorii\_1\_490\_U22243.1/1-474  
Methanolobus\_profundi\_687\_1168\_AB703629.1/1-466  
Methanolobus\_vulcani\_1\_490\_U22245.1/1-474  
Methanocella\_conradii\_1\_465\_JN081865.1/1-450  
Methanocella\_sp.\_279\_692\_KJ441441.1/1-398  
Methanocella\_paludicola\_240\_681\_AB300467.1/1-426  
Methanomicrobium\_mobile\_1\_438\_AF414044.1/1-438  
Methanoculleus\_marisnigri\_RCompl\_1\_436\_MH004450.1/1-436  
Methanoculleus\_palmolei\_259\_743\_AB300784.1/1-469  
Methanoculleus\_bourguensis\_259\_743\_AB300787.1/1-469  
Methanoculleus\_chikugoensis\_259\_743\_AB300779.1/1-469  
Methanogenium\_organophilum\_1\_501\_DQ229160.1/1-487  
Methanogenium\_boonei\_15\_520\_DQ229161.1/1-490  
Methanogenium\_cariaci\_1\_433\_DQ229157.1/1-420

CTGCTATGGCCAAACCGGAAACGCCGATATCCGGTGTGAACCGGATGGTATCTGTCCATGCTCC  
CGCGATATGCCACCGGAAACGCCGATCTCCGGTGTCAACCGGTGGTATCTGTCCATGCTCC  
CCGCGTCTCGGCACCGGTGACGCGCAGGTCAGGACTCAACGGTGTGGTACCTGTCCGAGATGCT  
CGGCTCTTTGCAACCGGAAACCGCAATGCTGGTCTCTCAGGCTGGTACCTCTCCATGTATG  
TGCACTCGGAATCTGCAACCGCAATGCGCGTCTCTCAGGCTGGTACCTCTCATGTATGAC  
GCTCCCTCGGAATCTGCAACCGCAACGCTGGTCTGTCCGGTGTGGTACCTCTCATGTATGAC  
---CAATTGCAACAGGTAAACGGAAACGCCGGTCTGTCCGGATGGTATCTCTCAATGTACC  
---CAATTGCAACCGGAAACGGAAACGCCGGTCTGTCCGGATGGTACCTTTCAATGTACC  
---CTCTGGCAACAGGAAACGGAAACGCTGGTCTGTCCGAGTGGTACCTCTGTATGTACT  
---CCTGCGCAACAGGAAACGGAAACGCTGGTCTCTCCGAGTGGTACCTCTGTATGTATG  
---CTCTTGCAACAGGAAACGGAAACGCTGGTCTTTCCGGATGGTACCTCTGTATGTACC  
CTGCGTCTGGCCACCGGCAGCTCGAACGCTGCGCTGTGCGGCTGGTACCTGTCCATGTACC  
CCGCTCTGGCGACTGGTAACTCGAACGCTGGCCGTGTGCGGCTGGTACCTGTCCATGTACC  
CCGCTATCGCAGCCGGTAACCTCAACGCTGGCCGTGTGCGGCTGGTACATGTCAATGTACC  
CATCAATCGCAACAGGTAACTCAACGCGAGTCTCAACGATGGTACCTTTGCATGTCTCA  
CCTGCACTCGCAACCGGAAACTCAACGCGCGGTGTGAACCGCTGGTACCTCTGCATGTCTCC  
CTCTCATCGCAACCGGAAACTCGAATGCGCGTGTGAACGCGTGGTATCTCTCATGTCTCC  
CCGCACTCGCAACCGGCAACTCAACGCGGCTCTCAACCGGATGGTATCTCTCATGTCTCC  
CGGCCATCGCACCGGAAACTCGAACCGCGGCTGAACCGCTGGTATCTCTCCATGTCTCC  
GTTCCATCGGTACCGGAAACTCCAATGCGCGTGTGAACGGATGGTACCTTTCCATGCTTA  
GTTCCATCGGTACCGGAAACTCCAATGCGCGTGTGAACGGATGGTACCTTTCCATGCTTA  
CTTCCATTGGTACCGGAAACTCCAATGCGCGTGTGAACGGATGGTATCTTTCC-----

Methanopyrus\_sp.\_8\_510\_KC18341.1/1-477  
Methanomassiliicoccus\_luminyensis\_1\_456\_strain\_B10\_HQ896500.1/1-455  
Methanopyrus\_candleri\_1\_414\_AF414042.1/1-414  
Methanosarcina\_mazei\_MH004454.1\_RComp1\_1\_433/1-433  
Methanosarcina\_horobornensis\_256\_737\_AB288266.1/1-466  
Methanosarcina\_subterranea\_259\_740\_AB288268.1/1-466  
Methanolobus\_oregonensis\_1\_490\_U22242.1/1-474  
Methanolobus\_zinderi\_256\_745\_EU715818.1\_RComp1/1-474  
Methanolobus\_taylorii\_1\_490\_U22243.1/1-474  
Methanolobus\_profundi\_687\_1168\_AB703629.1/1-466  
Methanolobus\_vulcani\_1\_490\_U22245.1/1-474  
Methanocella\_conradii\_1\_465\_JN081865.1/1-450  
Methanocella\_sp.\_279\_692\_KJ441441.1/1-398  
Methanocella\_paludicola\_240\_681\_AB300467.1/1-426  
Methanomicrobium\_mobile\_1\_438\_AF414044.1/1-438  
Methanococcus\_marisnigri\_RComp1\_1\_436\_MH004450.1/1-436  
Methanoculleus\_palmolei\_259\_743\_AB300784.1/1-469  
Methanoculleus\_bourgenis\_259\_743\_AB300787.1/1-469  
Methanoculleus\_chikugoensis\_259\_743\_AB300779.1/1-469  
Methanogenium\_organophilum\_1\_501\_DQ229160.1/1-487  
Methanogenium\_boonei\_15\_520\_DQ229161.1/1-490  
Methanogenium\_cariaci\_1\_433\_DQ229157.1/1-420  
Methanobacterium\_sp.\_1\_452\_JQ917190.1/1-452  
Methanobrevibacter\_smithii\_1\_423\_GU385700.1/1-423  
Methanobrevibacter\_oralis\_1\_414\_LK054628.1/1-414  
Methanobrevibacter\_ruminantium\_1-470  
Methanobrevibacter\_sp.\_D5\_mcrA\_plasmid\_365\_874\_KF214818.1/1-488  
Methanobrevibacter\_gottschalkii\_1\_471\_EU919431.1/1-471  
Methanobrevibacter\_boviskoreani\_1\_424\_KC865050.1/1-424  
Methanobrevibacter\_woesei\_1\_467\_EU919432.1/1-467  
Methanobrevibacter\_wolinii\_1\_395\_KC865051.1/1-395  
Methanobrevibacter\_arboriphilus\_1\_414\_AF414035.1/1-414  
Methanobacterium\_movens\_673\_1133\_HM802934.1/1-445  
Methanobacterium\_thermagggregans\_1\_440\_AY289750.1/1-440  
Methanothermobacter\_wolfeyi\_259\_719\_AB300780.1/1-445  
Methanothermobacter\_tenebrarum\_259\_723\_AB523786.1/1-449  
Methanothermobacter\_crinale\_18\_503\_HQ283274.1/1-470  
Methanobacterium\_aggregans\_690\_1116\_KP006500.1/1-411  
Methanobacterium\_aarhusense\_650\_1124\_AY386125.1/1-459  
Methanobacterium\_bryantii\_259\_719\_AY313806.1/1-445  
Methanococcus\_voltae\_5430\_5930\_X07793.1/1-485  
Methanothermococcus\_thermolithotrophicus\_1\_414\_AF414048.1/1-414  
Methanococcus\_maripaludis\_684\_1144\_AB703637.1/1-445  
Methanococcus\_vannielii\_4514\_5014\_M16893.1/1-485  
Methanococcus\_aeolicus\_1\_464\_AY354034.1/1-464  
Methanosphaera\_sp.\_1\_464\_FJ982887.1/1-464  
Methanosphaera\_stadtmanae\_1\_414\_AF414047.1/1-414

TGCTTTGCGAACTGGAAATCTCAACGCGGAAATCAACGGATGGTACTTAGCCA-GATCC  
CTGCATTTCGCTACTGGTAATGCTCAAACTGGTTTAAGTGCATGGTACTTAGGTATGTACT  
CTGCATTTCGCTACTGGTAATGCTCAAACTGGTTTAAGTGCATGGTACTTATCTATGATT  
CTGCATTTCGCAACTGGAAACGCACAAACCGGTTTATCTGCATGGTACTTAGCAACAATCT  
CTGCATTTCGCTACTGGTAATGCAACAACCTGGTTTAAGCGCATGGTACTTAGCTATGTACT  
CTGCATTTCGCTACTGGTAATGCAACAACCTGGTTTAAGCGGATGGTACTTATCCATGTACT  
CTGCATTTCGCAACTGGTAATCTCAAACTGGTTTAAGTGCATGGTACTTATCAACAATCT  
CTGCATTTCGCTACTGGTAATGCTCAAACTGGTTTAAGTGCATGGTACTTATCTCAACTACT  
CTGCATTTCGCTACTGGAAATGCTCAAACTGGTTTAAGCGCATGGTACTTATCTCAATACT  
CAGCTTTTCGCTACTGGAAATTCCTCAAACTGGTTTAAGCGCATGGTATTATCTATGTACT  
CTGCATTTCGCTACTGCTAATGCTCAAACTGGTTTAAGTGCATGGTACTTATCTATGTACC  
CAGCCTTCGCAACAGCAAAATCGCCAGACAGGTTCTCAGTGGATGGTACTCTCAATGTACC  
CAGCATTTGCAACAGGAAACCGCCAGACAGGTTCTCAGTGGATGGTACTTTCAATGTACC  
CAGGATTTCGCAACAGGAAATCTACAGACCGCATTAAGCGGATGGTACTTGTCAATGTACT  
CCGGATTTCGCAACAGGAAATCTACAGACCGCATTAAGCGGATGGTACTTATCAATGTACC  
CAGGATTTCGCAACTGGTAACGCTCAGACAGGTTTAAGCGCATGGTACTTATCCATGTACT  
CTGCATTTCGCTACTGGTAACGCACAAACTGGTTTAAGCGGTTGGTATTATCCATGTACT  
CTGCATTTCGCAACTGGAAATCTCAACAACCTGGTTTAAGTGCATGGTACTTATCCATGTACT  
TATGATATGCGCAACCGGTAATCGAACGCTGGTTTAACCGCTGGTACTTATCAACAATCT  
TATGATATGGCTACAGGAAATCTCAACGCTGGTGTTAACCGCTGGTACTTAAGCCAATCTA  
TATGATATGCGCAACAGGAAATCTCAACGCTGGTGTAAACCGCTGGTACTTATCAACAATCT  
TATGATATGCGCAACAGGAAATCTCAAACTGAGGAGTTAATGGATGGTATTATAGC-CAATAA  
TAGCATTCGCAACTGCTAACTCTAACGCGAGGTGTAACCGGATGGTACTTAAGTCAATTA  
TAGCATTCGCAACTGCTAACTCTAACGCGAGGTGTAATGGATGGTACTTAAGTCAATTA

|                       |                         |                 |     |     |              |
|-----------------------|-------------------------|-----------------|-----|-----|--------------|
| TTTCTTCCAACTCGTCTCTCT | ACAGGTCGGATGAGG         | ---             | G   | --- | TCT          |
| GTTCGCGCAA            | CTCGTTCGCCT             | ACAGGACGCACGAGG | --- | G   | CCT          |
| GTGCGCGCAA            | CTCGTTCGAGG             | TGAGGAGCGACGAGG | --- | G   | ACT          |
| GTGCCACAAACGTTCTGTCT  | ACCAGGCGCAGCAAG         | ---             | G   | --- | TCT          |
| GTGCTACAAACGTTCTGTCT  | ACCAGGCGCAGCAAG         | ---             | G   | --- | TCT          |
| GTGCCACAAACGTTCTGTCT  | ACCAGGCGCAGCAAG         | ---             | G   | --- | TCT          |
| GTGCCACAAACGTTCTCTCAT | ACCAGTCCGACGAAG         | ---             | G   | --- | TCT          |
| GTGCTACAAACGTA        | CTCTCTCT                | ACCAGTCCGACGAAG | --- | G   | TCT          |
| GTGCCACAAACGTTCTCTCAT | ACCAGTCCGACGAAG         | ---             | G   | --- | TCT          |
| GTGCTACAAACGTA        | CTCTCTCAT               | ACCAGTCCGACGAAG | --- | G   | TCT          |
| GTGCTACAAACGTA        | CTCTCAT                 | ACCAGTCCGACGAAG | --- | G   | TCT          |
| GTGCCACAAACGTGTTCTCT  | GCCGCTCCGACGAGG         | ---             | G   | --- | GCGCATGT     |
| GCGCGACCAACGTTGTTCT   |                         |                 |     |     |              |
| GTGCGACCAACGTTGTTCTGT | GCCGCTCTGATGAGG         | ---             | G   | --- | GCGCATT      |
| GTTCGCGCAA            | CTCACTCTCTA             | TGGAGCTGATCGCG  | --- | G   | TCT          |
| GTTCGCAACCA           | CTCGCTCTCTG             | TCAGGCTGACGAGG  | --- | G   | TGC          |
| GCTCCGCAAC            | CTCGCTCTCCA             | TCCGTGGAGACGAGG | --- | G   | CGC          |
| GGTCTGCAAC            | CTCGCTCTCA              | T               | --- | G   | AGCCCGACCGCG |
| GGTTCGCGCA            | ACTCCCTCTCTCA           | T               | --- | G   | AGTCCGACCGCG |
| GTTCGCAAC             | CTCACTNCTA              | TGGAGCGAGACGCG  | --- | G   | TCT          |
| GTTCGCAAACTC          | CTTTCTATTGAGCGCTGACCGCG | ---             | G   | --- | TCT          |
| TTTACGAAACTC          | CTCTCCA                 | TGGAGCTGACCGCG  | --- | G   | TCT          |
| GAGCATCA              | ACTCTCTCTCCA            | TCAGGAGTGACGAAG | --- | G   | TCT          |
| GTGCAGCTAACG          | TATTTCTCA               | TCAGAAATT       | --- | A   | T            |
| GTGCTGCTAACG          | TATTTCTCTA              | TCAGAAACGATGAAG | --- | G   | TAT          |
| GTGCAGCTAACG          | TATTCGCAA               | TCAGAAACGACGAAG | --- | G   | TTT          |
| GTGCAGCTAACG          | TATTTCTCCA              | TCAGAAACGATGAAG | --- | G   | ATT          |
| GTGCTGCTAACG          | TATTTCTCCA              | TCAGAAATGATGAAG | --- | G   | TTT          |
| GTGCTGCTAACG          | TATTTCTCTA              | TAAGAAACGATGAAG | --- | G   | TTT          |
| GTGCTGCTAAC           | CACATTTCTCT             | TCAGAAATGATGAAG | --- | G   | TTT          |

Methanopyrus\_sp.\_28\_510\_KC18341.1/1-477  
Methanomassiliicoccus\_luminyensis\_1\_456\_strain\_B10\_HQ896500.1/1-455  
Methanopyrus\_kandleri\_1\_414\_AF414042.1/1-414  
Methanosarcina\_mazei\_MH004454.1\_RCompl\_1\_433/1-433  
Methanosarcina\_horonobensis\_256\_737\_AB288266.1/1-466  
Methanosarcina\_subterranea\_259\_740\_AB288268.1/1-466  
Methanolobus\_oregonensis\_1\_490\_U2242.1/1-474  
Methanolobus\_zinderi\_256\_745\_EU715818.1\_RCompl/1-474  
Methanolobus\_taylorii\_1\_490\_U22243.1/1-474  
Methanolobus\_profundi\_687\_1168\_AB703629.1/1-466  
Methanolobus\_vulcani\_1\_490\_U22245.1/1-474  
Methanocella\_conradii\_1\_465\_JN081865.1/1-450  
Methanocella\_sp.\_279\_692\_KJ441441.1/1-398  
Methanocella\_paludicola\_240\_681\_AB300467.1/1-426  
Methanomicrobium\_mobile\_1\_438\_AF414044.1/1-438  
Methanoculleus\_marisnigri\_RCompl\_1\_436\_MH004450.1/1-436  
Methanoculleus\_palmolei\_259\_743\_AB300784.1/1-469  
Methanoculleus\_bourgenensis\_259\_743\_AB300787.1/1-469  
Methanoculleus\_chikugoensis\_259\_743\_AB300779.1/1-469  
Methanogenium\_organophilum\_1\_501\_DQ229160.1/1-487  
Methanogenium\_boonei\_15\_520\_DQ229161.1/1-490  
Methanogenium\_cariaci\_1\_433\_DQ229157.1/1-420  
Methanobacterium\_sp.\_1\_452\_JQ917190.1/1-452  
Methanobrevibacter\_smithii\_1\_423\_GU385700.1/1-423  
Methanobrevibacter\_oralis\_1\_414\_LK054628.1/1-414  
Methanobrevibacter\_ruminantium/1-470  
Methanobrevibacter\_sp.\_D5\_mcrA\_plasmid\_365\_874\_KF214818.1/1-488  
Methanobrevibacter\_gottschalkii\_1\_471\_EU919431.1/1-471  
Methanobrevibacter\_bovis\_koreani\_1\_424\_KC865050.1/1-424  
Methanobrevibacter\_woesei\_1\_467\_EU919432.1/1-467  
Methanobrevibacter\_wolinii\_1\_395\_KC865051.1/1-395  
Methanobrevibacter\_arboriphilus\_1\_414\_AF414035.1/1-414  
Methanobacterium\_movens\_673\_1133\_HM802934.1/1-445  
Methanobacterium\_thermagregans\_1\_440\_AY289750.1/1-440  
Methanothermobacter\_wolfeii\_259\_719\_AB300780.1/1-445  
Methanothermobacter\_tenebrarum\_259\_723\_AB253786.1/1-449  
Methanothermobacter\_crinale\_18\_503\_HQ283274.1/1-470  
Methanobacterium\_aggregans\_690\_1116\_KP006050.1/1-411  
Methanobacterium\_aarhusense\_650\_1124\_AY386125.1/1-459  
Methanobacterium\_bryantii\_259\_719\_AY313806.1/1-445  
Methanococcus\_voltae\_5430\_5930\_X07793.1/1-485  
Methanothermobacter\_thermolithotrophicus\_1\_414\_AF414048.1/1-414  
Methanococcus\_maripaludis\_684\_1144\_AB703637.1/1-445  
Methanococcus\_vannielii\_4514\_5014\_M16893.1/1-485  
Methanococcus\_aeolicus\_1\_464\_AY354034.1/1-464  
Methanosphaera\_sp.\_1\_464\_FJ982887.1/1-464  
Methanosphaera\_stadtmanae\_1\_414\_AF414047.1/1-414

Methanobrevibacter\_sp.\_D5\_mcrA\_plasmid\_365\_874\_KF214818.1/1-488  
Methanobrevibacter\_gottschalkii\_1\_471\_EU919431.1/1-471  
Methanobrevibacter\_boviskoreani\_1\_424\_KC865050.1/1-424  
Methanobrevibacter\_woesei\_1\_467\_EU919432.1/1-467  
Methanobrevibacter\_wolinii\_1\_395\_KC865051.1/1-395  
Methanobrevibacter\_arborihophilus\_1\_414\_AF414035.1/1-414  
Methanobacterium\_movens\_673\_1133\_HM802934.1/1-445  
Methanobacterium\_thermaggregans\_1\_440\_AY289750.1/1-440  
Methanothermobacter\_wolfelii\_259\_719\_AB300780.1/1-445  
Methanothermobacter\_tenebrarum\_259\_723\_AB523786.1/1-449  
Methanothermobacter\_crinale\_18\_503\_HQ283274.1/1-470  
Methanobacterium\_aggregans\_690\_1116\_KP06500.1/1-411

```

GCCCATTGGAGCTCAGGGGACCTTAACCTACCCAACTACGCAATGAACGTA-----
GCCCTTCGAGCTCAGGGGCCCCAACTACCC-----
GCCGCTCGAGCTGCGTGGTCCGGAATCAT-----
CCCAGACGAACTCCGTGG-----TCCA-----
CCCAGACGAACTCCGTGG-----TCCAA-----
CCCAGACGAACTCCGTGG-----TCCAA-----
GGCAGTTGAATCGGTGGACCAAATA-TCCA-----
GGCAGTTGAATCCGTGGACCAA-CTA-CCCAA-----
GGCTCTTGAATCGGTGGACCAAATA-TCCA-----
TGCTCTTGAATCCGTGGACCAA-----
TGCTCTTGAATCGGTGGACCAAATA-TCCA-----
GCGAGTTGA-----GGGGCCCGAACTA-CCCG-----

-----GATCGGAGAACTTCGCGGACCGAACTA-C-----
AGTCGGAGAACTCCGTGGACCC-----
GATCGGCGAGGTCGCGGCGGCCGA-----
GTCTAATGGGCGAGCTGCGTGGTCCGA-----
GTCTGATGGGAGAACTGCGTGGTCCGA-----
CATGGGCGAACTCGGTGGACCTTAATA-TCCGACTACGCCATGA-----
GTGGGCGAACTCCGTGGACCAAATA-TCCGACTACGCCATGAA-----A-----
GATGGGCGAACTCT-TGGACCAA-CTA-TCCAACACGCCATGA-----
GATCCACGAACTACGTGGTCTTAACATATCCCAACTACGCCATGAA--C-----

-----ACCACTTGAATGAGAGGCCCT-----
ACCACTTGAATTAGAGGACCTTAACATCTCTTAACATATGCAATGAA-----
ACCACTCGAAATGAGAGGACCAAATACTCTTAACACGCAATGAA--CGTGGTAC-----
ACCACTCGAAATGAGAGGACCAAATACTCCCAAATACTACGCCATGAA-----
ACCACTTGAATGAGAGGCTCTTAACATACCTTAACACGCAATGAA-----
ACCTCTTGAATGAGAGGACCTTAACATCCCTTAACACGCAATGAA-----
ACCTCTTGAATGAGAGGACCTTAACATCTCTTAACACGCAATGAA-----
ACCAGTTGAATGAGAGGGCCAAATACT-----
ACCACTCGAAATGAGAGGACCAA-----
GCCACTGGAGCTTCCGTGG-----
GCCACTGGAGCTTCCGTGA-CTA-----
ACCATTAGAGGCAAGGGGAGCCAA-----
ACCATTAGAGGCAAGGGAGCCAAATTATCCAAACTACGCAATGAA-----CGT-----

-----ACCATAGAACTTAGAGGAGCAATATACCCCAACTA-----T-----
ACCTCTTGAAGCAAGAGGAGCAA-----
ACCATTAGAATTAGAGGTCCTTAACATACCTTAACATATGCAATGAA-----CGT-----
ACCATTGAATTAGAGGTCCTTAACATACCTTAACATGCAATGAA-----CGT-----
ACCTCTTGAATTAGAGGACCTTA-----
ACCTCTTGAATTAGGGGGCCCTAACTACCTTAACACGCAATGAA--CGT-----
ACCATTGAATTAGAGGTCCTTAACATACCTTAACACGCAATG-----
AC-----GAATTAGAGGTCCTTAACATCTCTTAACATGCAATG-----
AC-----GAATTAGAGGTCCTTAACAT-----

```

CTGGAGCACA-----  
-----A-  
-----AA-  
-----  
-----A-

|                                                         |                        |
|---------------------------------------------------------|------------------------|
| Methanobacterium_aarhusense_650_1124_AY386125.1/1-459   | -----                  |
| Methanobacterium_bryantii_259_719_AF313806.1/1-445      | -----                  |
| Methanococcus_voltae_5430_5930_X07793.1/1-485           | -----AGGTCACCAAGGTGA-- |
| Methanothermococcus_thermolithot_1_414_AF414048.1/1-414 | -----                  |
| Methanococcus_maripaludis_684_1144_AB703637.1/1-445     | -----                  |
| Methanococcus_vannielii_4514_5014_M16893.1/1-485        | -----AGGTCACCAGGGAGA-- |
| Methanococcus_aeolicus_1_464_AY354034.1/1-464           | -----                  |
| Methanosphaera_sp._1_464_FJ982887.1/1-464               | -----AA                |
| Methanosphaera_stadtmanae_1_414_AF414047.1/1-414        | -----                  |
